# Supplementary material for: Evaluation of the Heterogeneity of Wheat Kernels as a Traditional Model Object in Connection with the Asymmetry of Development
Source: MDPI journal article supplement (doi:10.3390/sym14061124), 2022-05-30
Supplement: s1 [file s1]

Archive with 1 entries (1 files):
- symmetry-1719044-supplementary.pdf
