# Supplementary material for: Evaluation of the Heterogeneity of Wheat Kernels as a Traditional Model Object in Connection with the Asymmetry of Development
Source: MDPI journal article supplement (doi:10.3390/sym14061124), 2022-05-30
Supplement: s1 [file s1 › symmetry-1719044-supplementary.pdf]

Supplementary Materials for article “Evaluation of the heterogeneity of wheat kernels as a traditional model object in connection with the asymmetry of development”

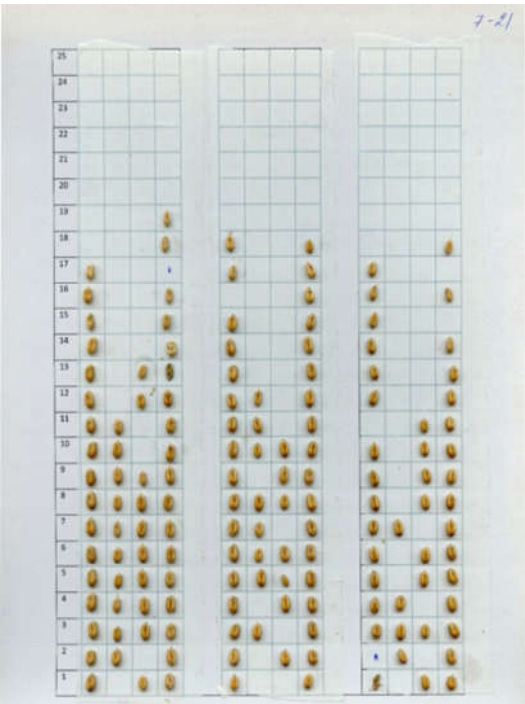

Figure S1. Kernels were fixed on a sheet for analysis, taking into account the location of the spikelets in the spike.

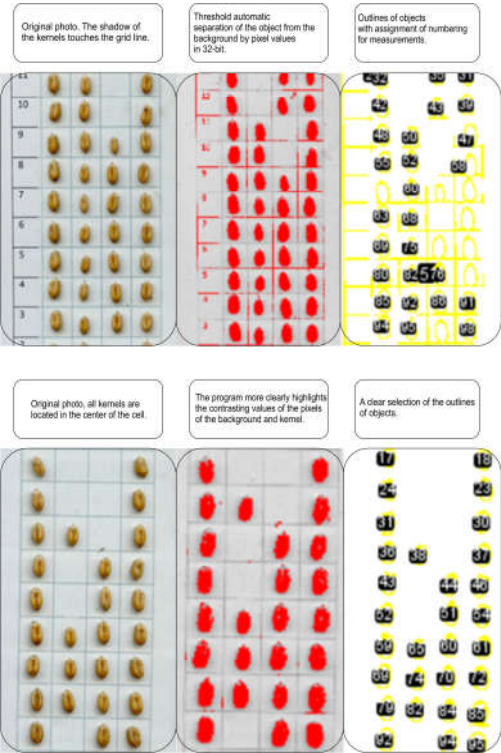

Figure S2. The sequence of analysis of kernel images in the program Image J.

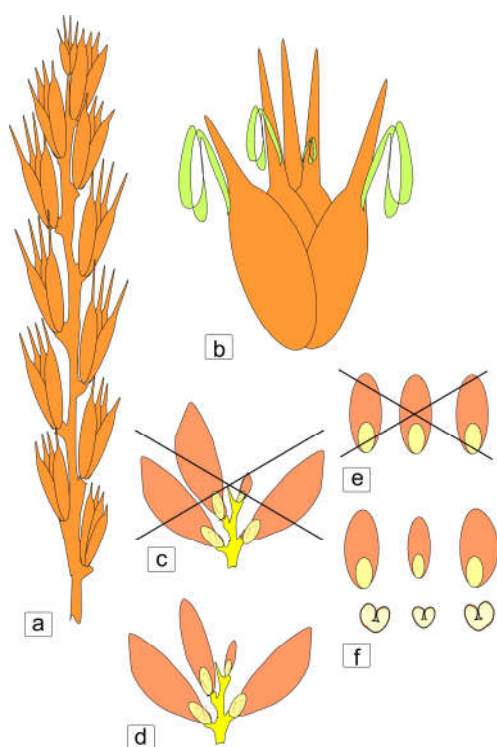

**Figure S3.** Scheme of a spike, spikelet and kernels of soft wheat of the Agata variety. Designations: a - mature spike; b - flowering spikelet; c - ideal representation, assuming uniform development of kernels; the proposed corrected kernel arrangement model; e - supposed ideal model of kernels of one spikelet; f - a corrected model of the real shape of kernels in spikelets, as well as sections of kernels, is proposed, taking into account their asymmetry.

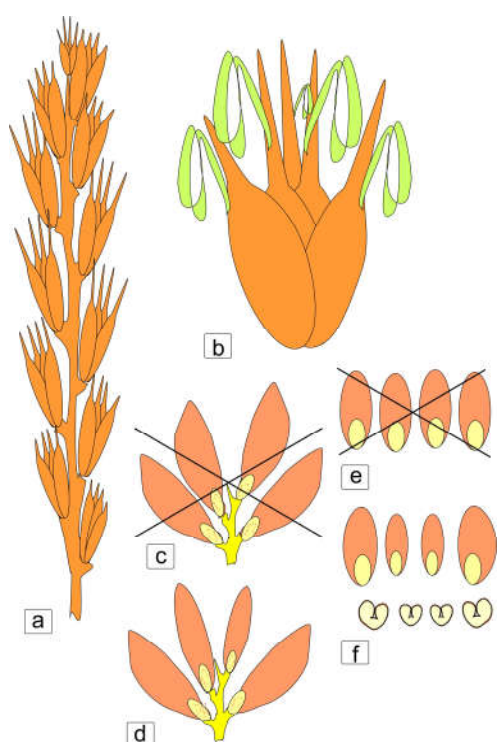

**Figure S4.** Scheme of a spike, spikelet and kernels of soft wheat of the Rubezhnaya variety. Designations: a - mature spike; b - flowering spikelet; c - ideal representation, assuming uniform development of kernels; d - proposed corrected kernel arrangement model; e - supposed ideal model of kernels of one spikelet; f - a corrected model of the real shape of kernels in spikelets, as well as sections of kernels, is proposed, taking into account their asymmetry.

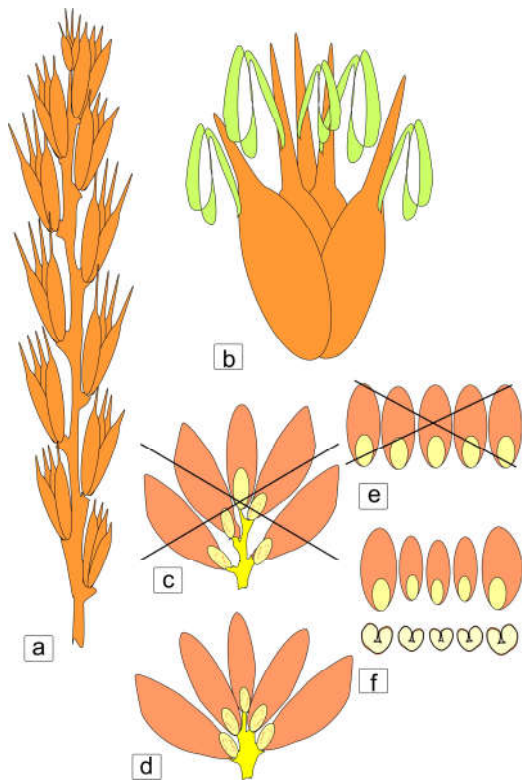

**Figure S5.** Scheme of a spike, spikelet and kernels of soft wheat of the Zlata variety. Designations: a - mature spike; b - flowering spikelet; c - ideal representation, assuming uniform development of kernels; the proposed corrected kernel arrangement model; e - supposed ideal model of kernels of one spikelet; f - a corrected model of the real shape of kernels in spikelets, as well as sections of kernels, is proposed, taking into account their asymmetry..

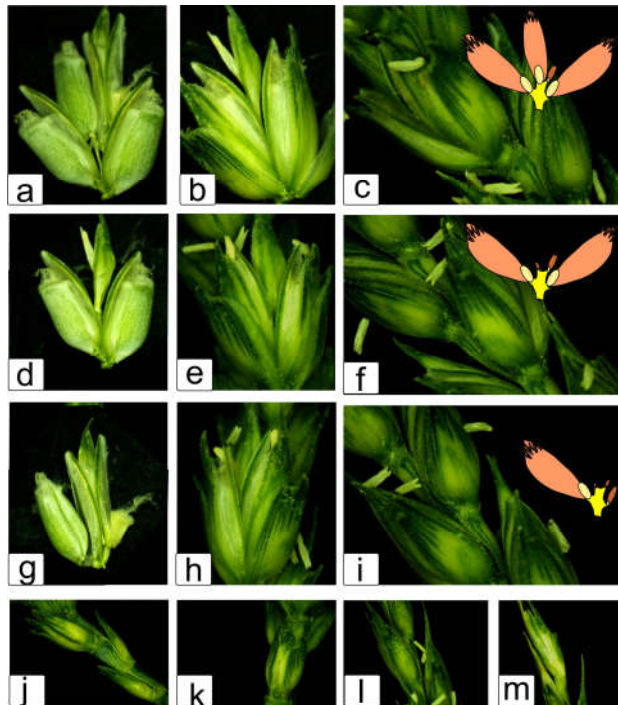

**Figure S6.** Features of the formation of the structure of spikelets and kernels, characteristic of different zones of the spike. Designation: kernels after setting (a, d, g); flowering spikelets (b,e,h); arrangement of spikelets on an spike (j,k,l,m).
